# Supplementary material for: Potent NTD-Targeting Neutralizing Antibodies against SARS-CoV-2 Selected from a Synthetic Immune System
Source: Vaccines (Basel). 2023 Mar 31;11(4):771. doi: 10.3390/vaccines11040771 (PMC10143083; doi:10.3390/vaccines11040771)
Supplement: Supplementary file 1 [file vaccines-11-00771-s001.zip › vaccines-2241176-supplementary.pdf]

## *Supplementary Material*

# **Potent NTD-targeting neutralizing antibodies against SARS-CoV-2 selected from a synthetic immune system**

**Wenping Li**<sup>1, 2, 3, 4</sup>, **Fulian Wang**<sup>1, 2, 3, 4</sup>, **Yu Li**<sup>1, 2, 3, 4</sup>, **Lei Yan**<sup>1</sup>, **Lili Liu**<sup>1</sup>, **Wei Zhu**<sup>1</sup>, **Peixiang Ma**<sup>5</sup>,  
**Xiaojie Shi**<sup>1, \*</sup>, **Guang Yang**<sup>1, \*</sup>

<sup>1</sup> Shanghai Institute for Advanced Immunochemical Studies, ShanghaiTech University, Shanghai, China

<sup>2</sup> School of Life Science and Technology, ShanghaiTech University, Shanghai, China.

<sup>3</sup> CAS Center for Excellence in Molecular Cell Science, Shanghai Institute of Biochemistry and Cell Biology, Shanghai, China

<sup>4</sup> University of Chinese Academy of Sciences, Beijing, China

<sup>5</sup> Shanghai Key Laboratory of Orthopedic Implants, Department of Orthopedic Surgery, Shanghai Ninth People's Hospital, Shanghai Jiao Tong University School of Medicine, Shanghai, China

\* Correspondence: yangguang@shanghaitech.edu.cn (G.Y); Tel.: +86-21-20685030; shixj@shanghaitech.edu.cn (X.S)

## Contents

|                 |    |
|-----------------|----|
| Figure S1 ..... | 3  |
| Figure S2 ..... | 4  |
| Figure S3 ..... | 5  |
| Figure S4 ..... | 6  |
| Figure S5 ..... | 7  |
| Figure S6 ..... | 8  |
| Figure S7 ..... | 9  |
| Figure S8 ..... | 10 |
| Table S1 .....  | 11 |

**Figure S1**

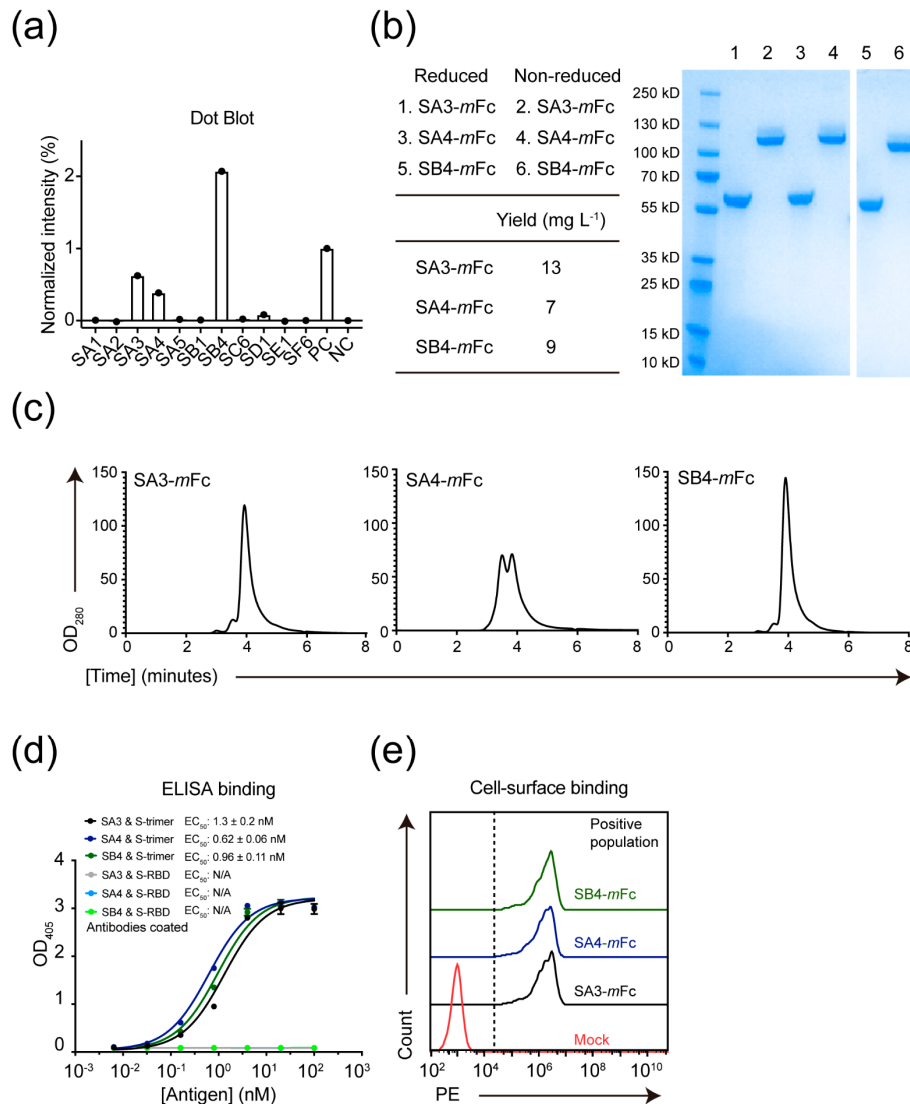

**Figure S1.** Candidate antibodies bind to spike of SARS-CoV-2 in non-RBD regions. **(a)** Dot Blot of these 11 unique antibodies expressing-supernatant were evaluated. Intensity was normalized by the signal of a purified *mFc*-tag antibody used as a positive control. **(b)** Expression yield of purified SA3, SA4, and SB4 in scFv-*mFc* format are shown. Three candidate antibodies in scFv-mouse Fc format were analyzed by SDS-PAGE, in non-reduced and reduced forms. **(c)** HPLC-SEC assessment of these three candidate antibodies stability. Aliquots of antibodies protein dissolved in PBS buffer (150 mM NaCl, 20 mM sodium phosphate, pH 7.4) were incubated at 4 °C for 21 days and subjected to analysis in an Agilent Bio SEC-5, 500A HPLC system running with the same PBS buffer at a flow rate of 0.5 mL min<sup>-1</sup>. **(d)** Binding ELISA for the three candidate antibodies against recombinant, biotinylated SARS-CoV-2 spike protein (S-trimer-His) and SARS-CoV-2 spike RBD protein (S-RBD-His) ( $n=3$ ). EC<sub>50</sub> of different antibodies are shown. **(e)** HEK293T cells transfected with expression plasmid encoding the full-length spike of SARS-CoV-2 were incubated with purified three antibodies and stained with PE labelled anti-human Fc secondary antibody, then analyzed by FACS.

**Figure S2**

(a)

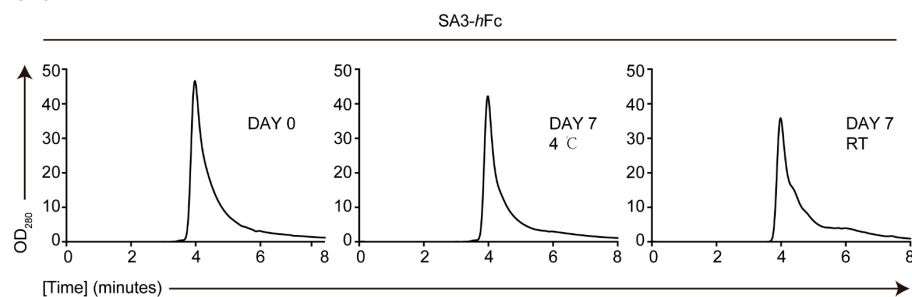

(b)

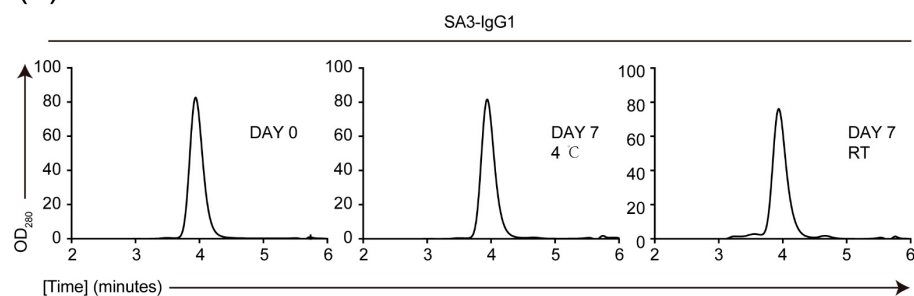

**Figure S2.** HPLC-SEC thermostability assay of SA3-hFc and SA3-IgG1. HPLC-SEC assessment of (a) SA3-hFc and (b) SA3-IgG1 thermal stability. Aliquots of SA3 protein dissolved in PBS buffer (150 mM NaCl, 20 mM sodium phosphate, pH 7.4) were incubated at 4 °C or room temperature (RT) for 7 days and subjected to analysis in an Agilent Bio SEC-5, 500A HPLC system running with the same PBS buffer at a flow rate of 0.5 mL min<sup>-1</sup>.

**Figure S3**

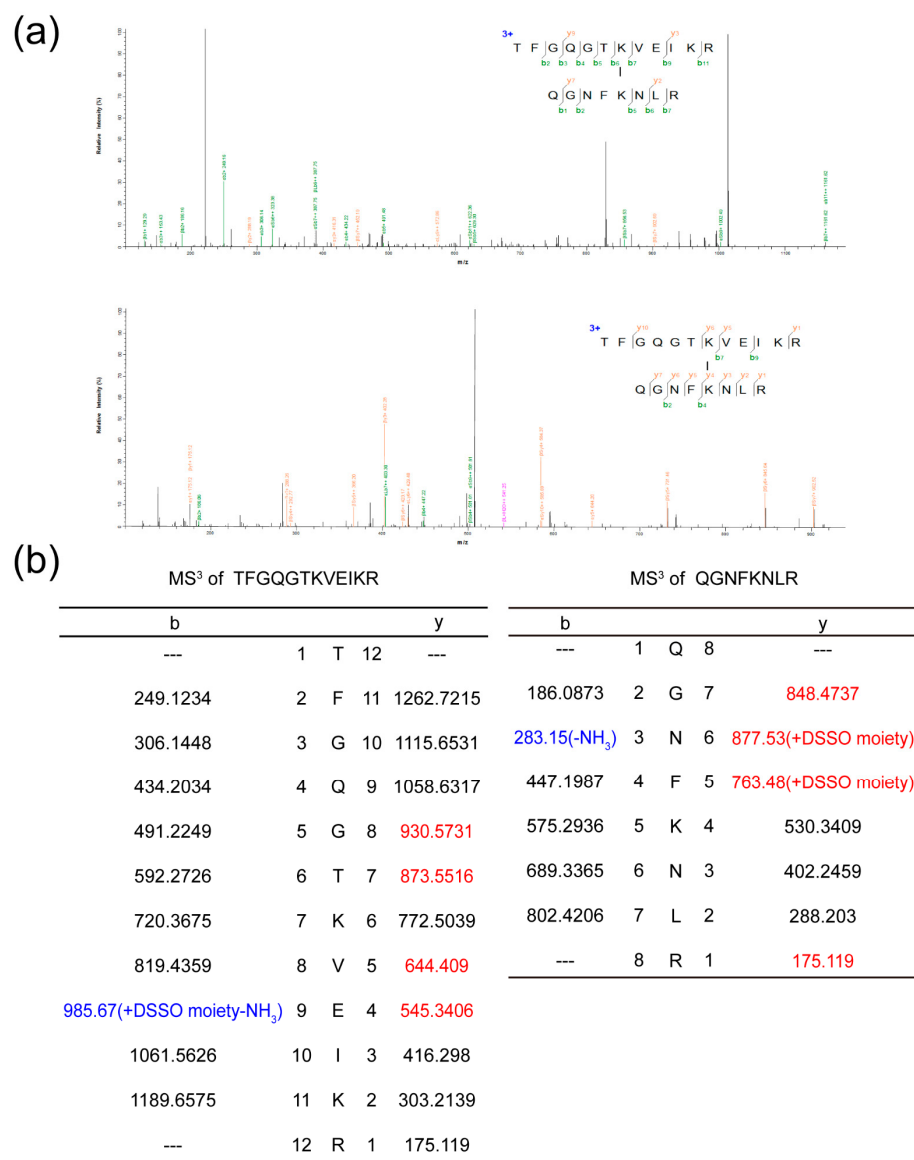

**Figure S3.** SA3 antibody cross-linked with SARS-CoV-2 spike via TFGQGTKVEIKR and QGNFKNLR peptides. **(a)** Tertiary MS for individual peptides TFGQGTKVEIKR and QGNFKNLR. **(b)** Peptide mass fingerprint for TFGQGTKVEIKR and QGNFKNLR.

**Figure S4**

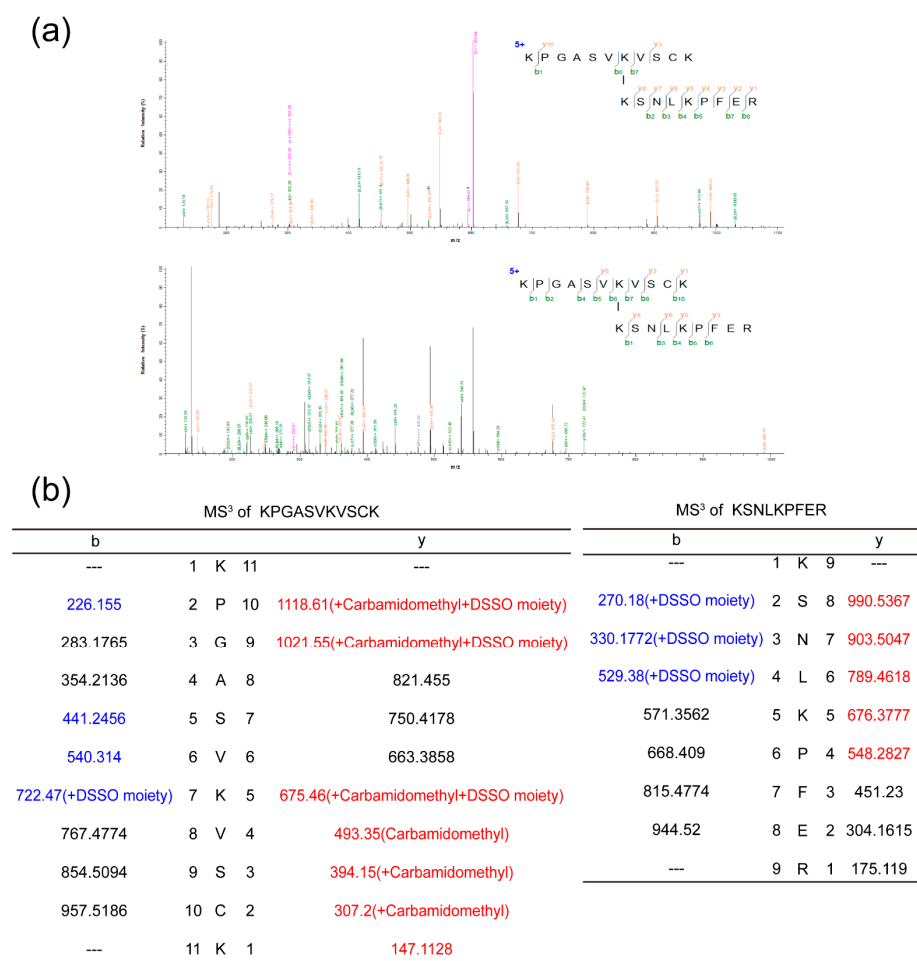

**Figure S4.** SA3 antibody cross-linked with SARS-CoV-2 spike via KPGASVKVSK and KSNLKPFER peptides. **(a)** Tertiary MS for individual peptides KPGASVKVSK and KSNLKPFER. **(b)** Peptide mass fingerprint for KPGASVKVSK and KSNLKPFER.

**Figure S5**

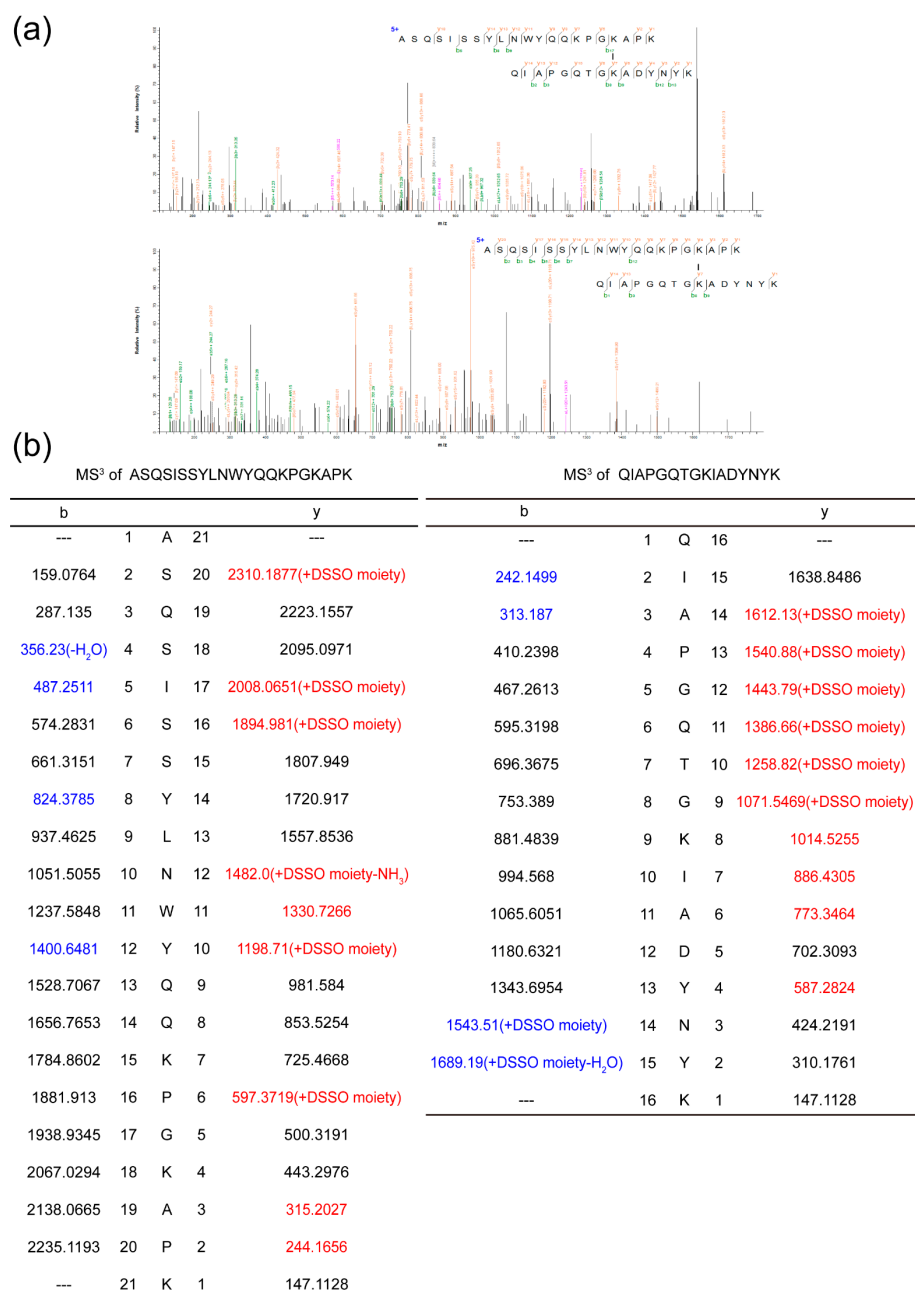

**Figure S5.** SA3 antibody cross-linked with SARS-CoV-2 spike via ASQSISSYLNLNWKYQKPGKAPK and QIAPGQTGKIADYNYK peptides. **(a)** Tertiary MS for individual peptides ASQSISSYLNLNWKYQKPGKAPK and QIAPGQTGKIADYNYK. **(b)** Peptide mass fingerprint for ASQSISSYLNLNWKYQKPGKAPK and QIAPGQTGKIADYNYK.

**Figure S6**

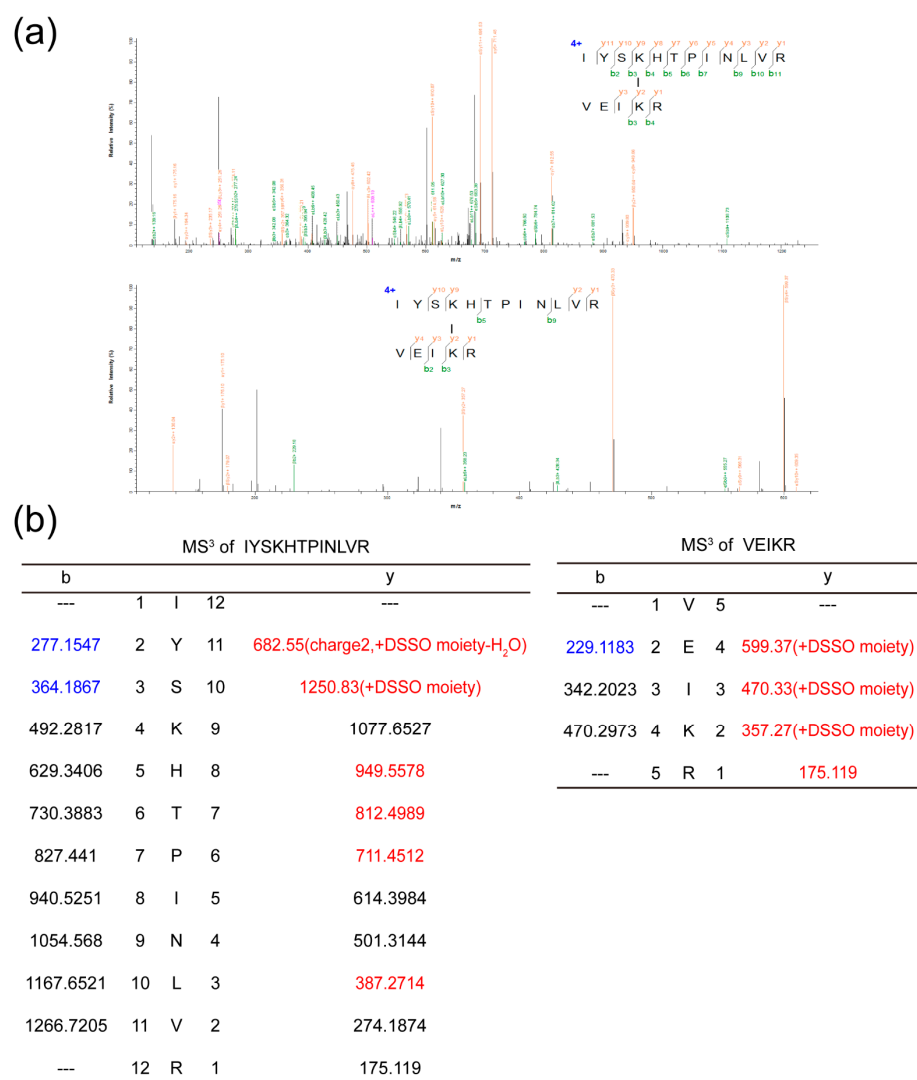

**Figure S6.** SA3 antibody cross-linked with SARS-CoV-2 spike via IYSKHTPINLVR and VEIKR peptides. **(a)** Tertiary MS for individual peptides IYSKHTPINLVR and VEIKR. **(b)** Peptide mass fingerprint for IYSKHTPINLVR and VEIKR.

**Figure S7**

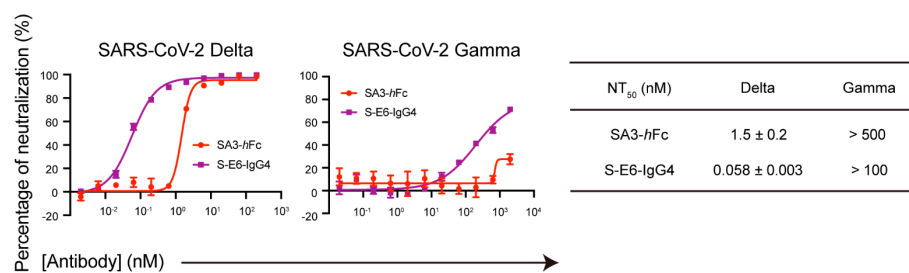

**Figure S7.** Neutralization of SA3-hFc against Delta and Gamma pseudovirus (PSV) strains. Dose-dependent neutralization of SA3-hFc against SARS-CoV-2 Delta and Gamma PSVs were performed in triplicates ( $n=3$ ). The apparent NT<sub>50</sub> values are determined by Hill analyses using one-way ANOVA of GraphPad Prism.

**Figure S8****(a)**

| IGHV1-18  | CDR-H1 | CDR-H2             | CDR-H3                  |    |
|-----------|--------|--------------------|-------------------------|----|
| SA3       | DYGIS  | WVSTYNVDNTNYAQKFQG | -----DEVGSDWLGR-----Y   | 11 |
| COV2-2034 | TYGIS  | WISAYNGNSNYGKKFQG  | DLPIKVVVPAADYNWFDP----- | 18 |
| CV42      | SYGIS  | WISAYNGNTNYAQKVQG  | DRGYAATFGVFDY-----      | 13 |
| C1636     | SYGIS  | WISAHNGNTNYAQKFQG  | -----FLALTYYYDSSGYPPDY  | 17 |
| C1736     | SYGIS  | WISGYDGNTNYAQKVQG  | DHRTVTTFGTFDY-----      | 13 |
| C1771     | NYGIS  | WSSVDNGHTNYAQKFOA  | DHRTVVTFGTFDY-----      | 13 |
| R616-1D2  | NYGLS  | WISGNNGNTNYAQKFQG  | DQSTVVTFGTFDY-----      | 13 |
|           | **:*   | * * : .:***:*.**   |                         |    |

**(b)**

| IGKV1-39  | CDR-L1       | CDR-L2   | CDR-L3      |    |
|-----------|--------------|----------|-------------|----|
| SA3       | RASQSISSYLN  | AASSLQS  | QQSYSTPRT-- | 9  |
| COV2-2034 | RASQSISSYLN  | AASSLQS  | QQSYSTPPT-- | 9  |
| CV42      | RASQSISSYLN  | AASSLQS  | QQTYITAFT-- | 9  |
| C1636     | RASQSISSYLN  | AASSLQS  | QQSYSTPRMYT | 11 |
| C1736     | RASQSIGYYLN  | AAASLQS  | QQSYSTPFT-- | 9  |
| C1771     | RASHNINTFLN  | APSILQS  | QQTYRTPFT-- | 9  |
| R616-1D2  | RASQINIRYLN  | AASGVQS  | QQSYITPFT-- | 9  |
|           | ***:.*. : ** | * : : ** | **:* *      |    |

**Figure S8.** Amino acid sequence analysis of SA3 antibody. **(a)** Multiple sequence alignment of heavy chain between SA3 and IGHV1-18/IGKV1-39 antibodies against the non-RBD spike of SARS-CoV-2. Antibody sequences were obtained from the CoV-AbDab database of the University of Oxford and aligned using CLUSTAL O (1.2.4) multiple sequence alignment. **(b)** Multiple sequence alignment of light chain between SA3 and IGHV1-18/IGKV1-39 antibodies against the non-RBD spike of SARS-CoV-2. Antibody sequences were obtained from the CoV-AbDab database of the University of Oxford and aligned using CLUSTAL O (1.2.4) multiple sequence alignment. Antibody complementarity determining regions (CDRs) were analyzed by abYsis.

**Table S1**

**Table S1.** The germline information and somatic hypermutations numbers (mutations) of heavy chain or light chain of the selected clones.

| Clone | HC Germline | HC Mutations | LC Chain | LC Germline | LC Mutations |
|-------|-------------|--------------|----------|-------------|--------------|
| SA1   | 5-51        | 13           | Kappa    | 3-20        | 5            |
| SA2   | 3-30        | 7            | Lambda   | 6-57        | 8            |
| SA3   | 1-18        | 11           | Kappa    | 1-39        | 0            |
| SA4   | 1-18        | 11           | Kappa    | 1-39        | 4            |
| SA5   | 1-69        | 12           | Lambda   | 5-45        | 5            |
| SB1   | 3-30        | 7            | Lambda   | 6-57        | 8            |
| SB4   | 1-18        | 11           | Kappa    | 1-39        | 6            |
| SC6   | 1-18        | 11           | Kappa    | 3-20        | 2            |
| SD1   | 3-30        | 6            | Lambda   | 5-45        | 6            |
| SE1   | 3-30        | 11           | Lambda   | 1-47        | 14           |
| SF6   | 3-30        | 7            | Lambda   | 6-57        | 8            |

Antibody sequences were analyzed by IMGT/V-QUEST database.
